# Supplementary material for: Dendrimer–doxorubicin conjugate as enzyme-sensitive and polymeric nanoscale drug delivery vehicle for ovarian cancer therapy
Source: Royal Society of Chemistry journal article supplement (doi:10.1039/c4py00601a), 2014-01-01
Supplement: c4py00601a1.pdf [file c4py00601a1.pdf]

# Dendrimer-doxorubicin conjugate as enzyme-sensitive and polymeric nanoscale drug delivery vehicle for ovarian cancer therapy

## Electronic Supplementary Information

Chengyuan Zhang, Dayi Pan, Kui Luo,\* Ning Li, Chunhua Guo, Xiuli Zheng and Zhongwei Gu\*

\*National Engineering Research Center for Biomaterials, Sichuan University, Chengdu 610064, China  
*E-mail addresses:* [zwgu@scu.edu.cn](mailto:zwgu@scu.edu.cn) (Z. Gu), [luokui@scu.edu.cn](mailto:luokui@scu.edu.cn) (K. Luo).

\*Corresponding authors. Gu is to be contacted at Tel.: +86 28 85410336; fax: +86 28 85410653. Luo, Tel./fax: +86 28 85410653.

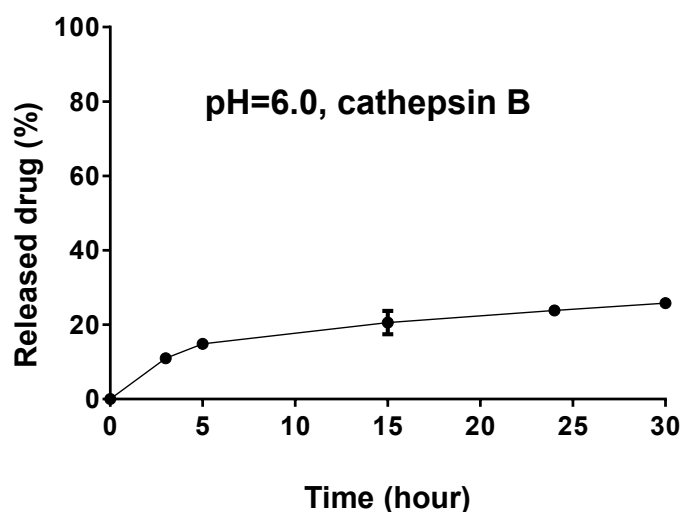

Fig. S1 The release of free DOX from the dendrimer-DOX conjugate was performed at pH 6.0, 37 °C in the presence of cathepsin B (5.6  $\mu$ M) with concentration of conjugate 3 mg/mL. At predetermined time points (3 h, 5 h, 15 h, 24 h, 30 h), 80  $\mu$ L sample was withdrawn and analyzed by RP-HPLC. The release drug DOX concentration at different time points was measured using RP-HPLC (Agilent Technologies 1100 series, Zorbax C8 column 4.6 $\times$ 150 mm) with gradient elution from 2 to 90% of Buffer B within 20 min and flow rate 1.0 mL/min (Buffer A: deionized water with 0.1% TFA, Buffer B: acetonitrile containing 0.1% TFA). For the nanoparticles in buffer without enzyme cathepsin B, no released DOX was observed by HPLC.

---

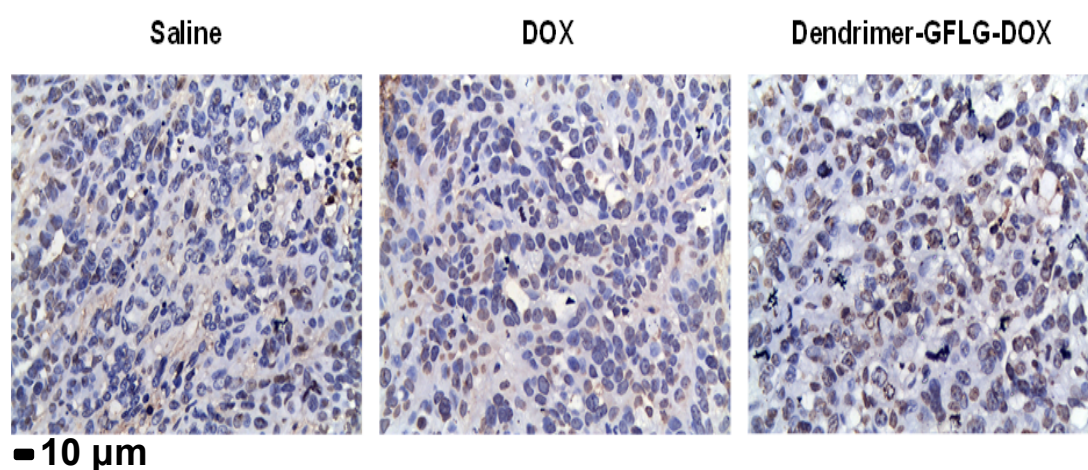

Fig. S2 TUNEL immunohistochemical (IHC) staining of tumor tissues. The brown areas indicate TUNEL-positive staining. Representative photomicrographs of SKOV-3 tumors harvested at the end of study, from mice receiving various treatment with physiological saline as control (Saline), free drug DOX (DOX), and mPEGylated dendrimer-DOX conjugate based nanoparticle (Dendrimer-GFLG-DOX).

---

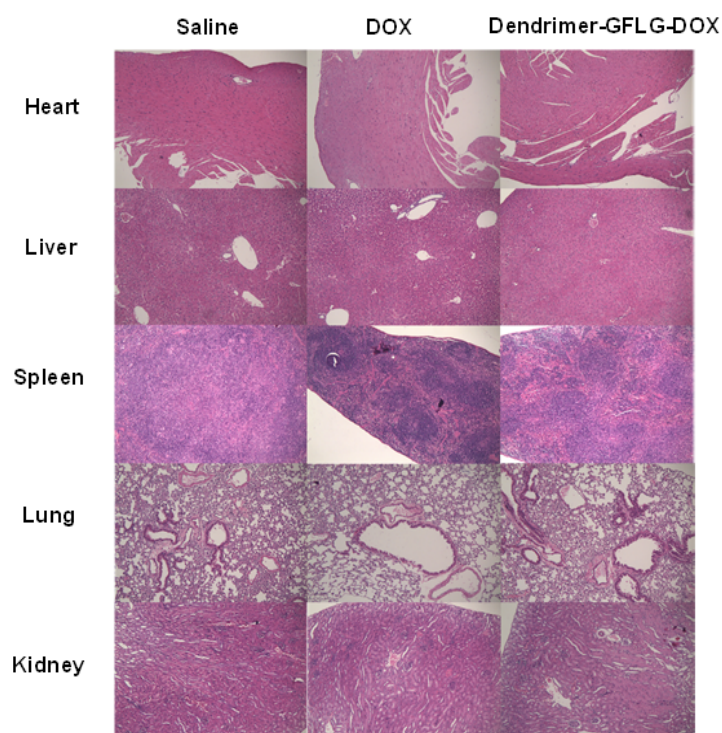

Fig. S3 Histological analysis for different organs of tumor bearing mice administrated control (Saline), free drug DOX (DOX) and mPEGylated dendrimer-GFLG-DOX conjugate based nanoparticle (Dendrimer-GFLG-DOX) (all tissues:  $\times 100$ ). No signs of toxicity were observed from each treatment group.

---
